1 **Comparison of Mortality and Viral Load in Rainbow Trout (*Oncorhynchus***  
2 ***mykiss*) infected with Infectious Pancreatic Necrosis Virus (IPNV)**

3 **Genogroups 1 and 5**

4 David Tapia<sup>1,2</sup>, Agustín Barría<sup>1</sup> & José M. Yáñez<sup>1,3</sup>

5

6 <sup>1</sup>Facultad de Ciencias Veterinarias y Pecuarias, Universidad de Chile, Av. Santa  
7 Rosa 11735, La Pintana, Santiago 8820808, Chile.

8 <sup>2</sup>Doctorado en Acuicultura, Programa Cooperativo Universidad de Chile,  
9 Universidad Católica del Norte, Pontificia Universidad Católica de Valparaíso,  
10 Chile.

11 <sup>3</sup>Núcleo Milenio INVASAL, Concepción, Chile.

12

13 **ABSTRACT**

14 Infectious Pancreatic Necrosis Virus (IPNV) is the etiological agent of a  
15 highly contagious disease that affects farmed salmonids. IPNV isolates have been  
16 phylogenetically classified into eight genogroups, of which two are present in  
17 Chile, genogroups 1 and 5. Here we compare the mortality rate caused by  
18 isolates from both genogroups in rainbow trout (*Oncorhynchus mykiss*) fry to  
19 determine if there is an association between host susceptibility and phylogenetic  
20 characterization of IPNV. Fish were challenged by immersion with one of four  
21 isolates (two of each genogroup) and mortality curves were assessed after 30  
22 days. Viral load was measured in all mortalities and in live fish sampled at 1, 7  
23 and 20 days post-infection. Although mortality was low throughout the  
24 challenge, differences were found between fish infected with different isolates.

25 Both isolates from genogroup 1, caused greater cumulative mortalities than  
26 either of the isolates from Genogroup 5. When combined, the overall mortality  
27 rate of fish challenged with genogroup 1 isolates was significantly higher than  
28 those infected with genogroup 5. However, viral load was lower on trout infected  
29 with genogroup 1 isolates. These results suggest that rainbow trout are more  
30 susceptible to IPNV isolates from genogroup 1 than genogroup 5.

31

## 32 KEYWORDS

33 IPNV, Rainbow trout, Mortality, Viral load, Phylogenetic Classification, Host  
34 susceptibility.

35

36

## 37 INTRODUCTION

38

39 Infectious Pancreatic Necrosis (IPN) is a highly contagious viral disease  
40 that causes great economic losses to trout and salmon aquaculture worldwide.  
41 The etiological agent of the disease, IPN virus (IPNV), a non-enveloped, double-  
42 stranded RNA (dsRNA) virus which affects the main salmonid species cultured  
43 worldwide, i.e. Atlantic salmon (*Salmo salar*) and rainbow trout (*Oncorhynchus*  
44 *mykiss*). The disease is transmitted horizontally as well as vertically, and after an  
45 outbreak surviving fish can become asymptomatic carriers of the virus,  
46 representing a risk to their offspring and other susceptible fish (Bootland et al.,  
47 1991). Salmonids are more susceptible to IPNV during their first feeding fry  
48 stage in fresh water, where prevalence of the disease is high, and as post-smolts  
49 shortly after transfer to the sea (Jarp et al., 1995; Evensen & Santi, 2008). During

50 an IPN outbreak, mortality rates can vary greatly from insignificant to almost  
51 100%, and these differences have been ascribed to several environmental, viral  
52 and host-related factors. Host genetic variability associated to IPNV mortality  
53 has been confirmed in Atlantic salmon with the identification of a major-effect  
54 quantitative trait loci (QTL), associated with mortality levels in fresh water and  
55 seawater (Houston *et al.*, 2008; Moen *et al.*, 2009), and the subsequent  
56 identification of epithelial cadherin associated with resistance to IPNV (Moen *et al.*  
57 *et al.* 2015). In rainbow trout, resistance against IPNV has also shown significant  
58 genetic variation (Flores-Mara *et al.*, 2017; Yoshida *et al.*, 2019). Furthermore, a  
59 recent study detected a marker which moderately explains the genetic variance  
60 for this trait (Rodríguez *et al.*, 2019).

61 Amino acids 217 and 221 of the IPNV capsid protein, VP2, are associated  
62 with differences in virulence and replication rates between isolates (Santi *et al.*,  
63 2004; Song *et al.* 2005). Thus, IPNV isolates with amino acids Thr<sub>217</sub> and Ala<sub>221</sub>  
64 are considered highly virulent and Pro<sub>217</sub> and Thr<sub>221</sub> as almost avirulent (Song *et al.*  
65 *et al.*, 2005). However, these markers have only been studied in IPNV type Spjarup  
66 (Sp, genogroup 5), and do not always correlate with field mortality rates seen in  
67 IPN outbreaks (Ruane *et al.*, 2015; Tapia *et al.*, 2015).

68 IPNV belongs to the genus *Aquabirnavirus*, from the *Birnaviridae* family.  
69 Its genome consists of two dsRNA segments: segment A, which encodes a viral  
70 capsid protein (VP2), an internal protein (VP3), a viral protease (VP4), and a  
71 non-structural protein (VP5); and segment B, which encodes the RNA  
72 polymerase (VP1) (Dobos, 1995). *Aquabirnaviruses* were initially classified based  
73 on antiserum neutralization assays directed against three IPNV reference  
74 serotypes: VR299, Sp and Ab (Macdonald & Gower, 1981). Subsequently, a

75 standard serological classification scheme was proposed, and the strains were  
76 divided into serogroups A and B. The former serogroup contains the majority of  
77 IPNV isolates associated with the disease and are grouped into 9 serotypes, A1-  
78 A9 (Hill & Way, 1995). More recently, *Aquabirnaviruses* were classified according  
79 to their nucleotides and deduced amino acid sequences. Phylogenetic analysis of  
80 the coding region of the VP2 protein from 28 aquatic birnavirus isolates revealed  
81 that the nine reference strains of serogroup A were grouped into six genogroups,  
82 some of which were composed of several genotypes (Blake et al., 2001). These  
83 genogroups are highly correlated with the serological classification and  
84 geographic origin of the strains, for example, genogroup 5 corresponds to  
85 serogroup A2 and includes several isolates from Europe such as Sp, Fr10 and N1,  
86 while genogroup 1 correlates to serotype A1 and includes strains from the  
87 United States, such as West Buxton (WB), VR-299 and Buhl (Blake et al., 2001).  
88 Following this approach, a seventh genogroup comprised only by Japanese  
89 aquabirnaviruses was proposed by Nishizawa et al. (2005). An Aquabirnavirus  
90 isolated from *Oncorhynchus mykiss* in Australia was classified in an eighth  
91 genogroup (McCowan et al., 2015; Mohr et al., 2015).

92 Chile is currently the largest producer of rainbow trout worldwide (FAO  
93 2019); and it was in this species that IPNV was isolated for the first time in the  
94 country (McAllister & Reyes 1984). The isolate corresponded to serotype VR-299  
95 or 1A (Espinoza et al., 1985, McAllister & Reyes, 1984), and it was later classified  
96 in genogroup 1 (Eissler et al., 2011). During the late nineties, IPN disease was  
97 confirmed in Atlantic salmon farms and since then the virus has spread through  
98 the country's different farming areas. Only two IPNV genogroups have been  
99 reported in the country, genogroup 1 (North American origin) and genogroup 5

100 (European origin), with the latter being more dominant and widely dispersed  
101 (Mutoloki & Evensen, 2011, Eissler *et al.*, 2011, Calleja *et al.*, 2012; Tapia *et al.*,  
102 2015; Manríquez *et al.* 2017).

103 More recently, Torres *et al.* (2016) analysed data from Chilean isolates  
104 and suggested a host-specific relationship between the reported genogroups and  
105 the salmonid species cultivated in the country, since isolates belonging to  
106 genogroup 5 were mainly isolated from *S. salar*, while IPNV genogroup 1 was  
107 mostly isolated from *O. mykiss* or *O. Kisutch*. However, to date there are no  
108 experimental studies aimed to evaluate a relationship between these two  
109 genogroups and the differential susceptibility between host species. Thus, the  
110 objective of this study was to compare the mortality rates and viral load in  
111 rainbow trout infected with isolates from genogroups 1 and 5 to confirm the  
112 likely association between this species and the phylogenetic classification of  
113 IPNV.

114

## 115 MATERIALS AND METHODS

116

### 117 *Virus isolates and fish:*

118

119 Four IPNV isolates obtained from field outbreaks in Chile were used for  
120 the experimental challenges in this study. The isolates belong to the strain  
121 collection of the Laboratory of Virology of the University of Valparaíso and were  
122 molecularly characterized previously by sequencing both segments of the virus  
123 genome according to Jorquera *et al.* (2016). The four isolates represent the two  
124 IPNV genogroups present in the country: two isolates from genogroup 1 (type

125 strain WB), herein referred to as WB1 and WB2, respectively; and two from  
126 genogroup 5 (type strain Sp), herein referred to as SP1 and SP2, respectively. All  
127 isolates were propagated and titrated in the Chinook Salmon Embryo (CHSE-  
128 214) cell line. For virus propagation, cells were grown in Leibovitz (L-15) culture  
129 medium, supplemented with 10% fetal bovine serum (FBS, HyClone) and 50  
130  $\mu\text{g}\cdot\text{mL}^{-1}$  gentamicin. Then the cells were infected with first passages of the  
131 isolates at a multiplicity of infection (MOI) of 0.001 FF/cell and incubated at 15  
132  $^{\circ}\text{C}$  until a massive cytopathic effect (CPE) was observed (around 3 to 5 days post-  
133 infection). The cells were then subjected to two cycles of freezing and thawing  
134 and centrifuged at  $3000 \times g$  for 15 min at  $4^{\circ}\text{C}$ . Supernatants were collected,  
135 aliquoted and immediately stored at  $-80^{\circ}\text{C}$  until titration or challenge  
136 inoculation.

137 Titration was done twice, between two to three days after the isolates  
138 were propagated and prior to the inoculation of the fish. For standard end-point  
139 titration, aliquots of the isolates were thawed and serially diluted in L-15  
140 medium and inoculated into confluent monolayers of CHSE-214 cells grown on  
141 96-well plates. The cells were incubated at  $15^{\circ}\text{C}$  for a week and then observed  
142 under an inverted light microscope. The infected wells with clear ECP were  
143 counted and the  $\text{TCID}_{50}$  was calculated according to the Reed & Muench (1938)  
144 method.

145 Rainbow trout fry ( $\sim 0.9$  g) were provided by the Rio Blanco hatchery  
146 (Los Andes, Chile) and transferred to the aquaculture facilities of the  
147 “Laboratorio Cerrillos”, Veterquímica S.A. (Santiago, Chile). Prior to the challenge  
148 test, the fish were sanitarly checked for the presence of IPNV, *Renibacterium*  
149 *Salmoninarum*, *Piscirickettsia salmonis*, *Flavobacterium psychrophilum* and *F.*

150 *columnare* by qPCR. All of these diagnostic analyses were carried out at  
151 Veterquimica diagnostic laboratory. Fish were held at 10-15 °C and fed daily on  
152 commercial feed until the day preceding virus exposure.

153

154 *Experimental challenges and Sampling:*

155

156 In order to compare the mortality caused by the IPNV isolates in rainbow  
157 trout, 1,440 fish were challenged during January 2018. Prior to challenge, fish  
158 were acclimatized for 22 days and then allocated into eight 0.02 m<sup>3</sup> aerated  
159 challenge tanks, with ~180 individuals per tank. The experimental design  
160 included two tank replicates per treatment. Once distributed in their respective  
161 tanks, fish were challenged by immersion using the four IPNV isolates. For this,  
162 duplicate groups of fish were exposed to each isolate at  $1 \times 10^5$  TCID<sub>50</sub>/mL<sup>-1</sup>.  
163 Thereafter, fish were maintained at 10 °C and mortality was recorded daily until  
164 the trial ended 30 days post-infection. Dead fish were weighed and the entire  
165 viscera, including kidney, was sampled to confirm the presence of IPNV and to  
166 estimate viral load, following the procedures recommended by the World  
167 Organisation for Animal Health (OIE 2006). Mortality samples were maintained  
168 in L-15 medium at 4 °C until homogenization. Additionally, six fish were taken  
169 randomly from each tank and sacrificed by benzocaine overdose (BZ-20;  
170 Veterquimica, Chile) at days 1, 7 and 20 post-infection. The fish were weighed  
171 and tissue samples were taken and stored in RNAlater® solution (Ambion, USA)  
172 at -80 °C until use. All procedures for challenges and sampling were approved by  
173 the Comité de Bioética Animal, Facultad de Ciencias Veterinarias y Pecuarias,  
174 Universidad de Chile (Certificate N° 17086-VET-UCH).

175

176 *IPNV testing and viral load*

177

178         Samples from mortality and survivor fish were tested to confirm the  
179 presence of IPNV and to estimate viral load. A RT-qPCR assay for the VP1 region  
180 of the virus (Eissler *et al.* 2011) was used for confirmation of the presence of the  
181 virus in both mortality and survivor fish samples, while an indirect fluorescent  
182 antibody test (IFAT) targeting the VP2 protein of the virus (Espinoza & Kuznar  
183 2002) was used only on samples from mortalities. For the latter, homogenization  
184 was done in 1 mL of L-15 medium using bead beating in the Minlys (Bertin)  
185 homogenizer. The homogenates were pelleted at  $2000 \times g$  (15 min at 4°C) in a  
186 MIKRO 22R centrifuge (Hettich Zentrifugen), and the supernatants were  
187 collected and stored at -80°C until use. For the IFAT assay the methodology  
188 described by Espinoza & Kuznar (2002) was followed with slight modifications.  
189 Briefly, 100 µL of each supernatant was serially diluted in L-15 medium and  
190 inoculated into duplicate confluent monolayers of CHSE-214 cells grown on 24-  
191 well plastic plates with 12 mm circular glass coverslips. After 24 h, the cell  
192 monolayers were fixed with cold methanol for 10 min, rinsed with PBS 1× buffer,  
193 and incubated with a polyclonal antibody against VP2 IPNV during 1 h at room  
194 temperature. Cells were rinsed again, and a secondary anti-rabbit antibody  
195 (Sigma) conjugated with fluorescein isothiocyanate (FITC) was used to label the  
196 infected cells (1/100 in PBS). After rinsing the cells for a third time, the circular  
197 glass cover-slips containing the cell monolayers were mounted on glass slides  
198 using an anti-fade mounting solution (DakoCytomation) and visualized using an  
199 epifluorescence microscope (Olympus BX60). For the RT-qPCR assay, total RNA



200 was extracted from 200  $\mu$ L of each supernatant from the mortality samples with  
201 the E.Z.N.A.<sup>TM</sup> Total RNA Kit I (Omega Bio-tek) according to the manufacturer's  
202 instructions. The extracted RNA was eluted with molecular biology grade water  
203 and stored at -80°C until use. In the case of samples taken from alive fish at  
204 different timepoints (1, 7 and 20 days), tissues (maintained in RNAlater) were  
205 homogenized in 1 mL of TRIzol reagent (Invitrogen) by bead beating, and total  
206 RNA was extracted following the standard TRIzol RNA isolation procedure.

207 Concentration and purity of the extracted total RNA was determined by  
208 measuring the absorbance ratio at 260 nm over 280 nm using a  
209 spectrophotometer (MaestroNano, Maestrogen). To ensure that contamination  
210 was strictly controlled during the RNA extraction process, a negative control  
211 using molecular biology grade water was included. The extracted RNA was  
212 reversely transcribed and amplified by a one-step RT-qPCR using a 48-well plate  
213 real-time PCR system Step-One (Applied Biosystems). The sets of primers and  
214 probes used for the VP1 and for the Elongation Factor -1 alpha (ELF1 $\alpha$ ) RT-qPCR  
215 assays are shown in Table 1. The AgPath-IDTM One-Step RT-PCR Kit (Applied  
216 Biosystems) was used for the amplification of the VP1 protein in segment B.  
217 Reaction was carried out in a 15  $\mu$ L reaction volume containing 7.5  $\mu$ L of RT-PCR  
218 Buffer (2X), 1.35  $\mu$ L of each forward and reverse primers (0.9  $\mu$ M), 0.3  $\mu$ L of the  
219 VP1 Taqman probe (0.2  $\mu$ M), 0.6  $\mu$ L of RT-PCR Enzyme Mix (25X) and 2  $\mu$ L of  
220 total RNA as template. The thermal profile used was 48°C for 10 min for reverse  
221 transcription, pre-denaturation at 95°C for 10 min, followed by 40 cycles of  
222 denaturation at 95°C for 15 s and annealing/extension at 59°C for 45 s. In case of  
223 ELF1 $\alpha$  amplification was carried out in a 15  $\mu$ L reaction volume containing 7.5  
224  $\mu$ L of 2X Brilliant III Ultra-Fast SYBR<sup>®</sup> Green QRT-PCR Master Mix (Stratagene),

225 0.75  $\mu$ L of each forward and reverse primers (0.5  $\mu$ M), 0.8  $\mu$ L of RT/RNase block,  
226 0.2  $\mu$ L of ROX (0.3  $\mu$ M) as passive reference and 2  $\mu$ L of total RNA as template.

227 The thermal profile used was 50°C for 5 min for reverse transcription,  
228 pre-denaturation at 95°C for 3 min, followed by 40 cycles of denaturation at 95°C  
229 for 5 s and annealing/extension at 60°C for 10 s. Finally, a melting curve analysis  
230 from 70°C to 95°C was performed. The detection limit and the efficiency of the  
231 assays were evaluated using 10-fold dilutions of total RNA from the virus and  
232 from non-infected rainbow trout. The amplification efficiencies were 103% for  
233 the IPNV RT-qPCR targeting segment B (Taqman) and 100% for the ELF1 RT-  
234 qPCR (SYBR green), and the cut-off Ct values were 30.8 and 32.4, respectively.

235

#### 236 *Statistical analysis*

237

238 Kaplan-Meier mortality curves were calculated using the GraphPad Prism  
239 7 software (GraphPad Software Inc., La Jolla, CA, USA). For this analysis,  
240 mortalities were considered the result of IPNV infection only in cases when IPNV  
241 presence was confirmed by IFAT and/or RT-qPCR, while live fish sampled at  
242 different time points were not taken into account. Cumulative mortality rates  
243 over time between fish infected with different isolates and genogroups were  
244 compared using the Log-rank test ( $p < 0.05$ ). In order to compare the results and  
245 evaluate the agreement between the two diagnostic methods used, the Kappa  
246 statistic was calculated. The scale used to interpret the Kappa statistic was as  
247 follows: below 0.01 less than chance agreement, 0.01–0.20 slight agreement,  
248 0.21–0.40 fair agreement, 0.41–0.60 moderate agreement, 0.61–0.80 substantial  
249 agreement and 0.81–0.99 indicate almost perfect agreement (Viera & Garrett

250 2005). For the estimation of viral load in dead and survivor fish samples by RT-  
251 qPCR, relative expression of IPNV VP1 mRNA was calculated using the Pfaffl  
252 method (Pfaffl 2001) which accounts for differences in PCR efficiency.  $ELF1\alpha$   
253 was used as a housekeeping gene for normalization, and the sample with the  
254 lowest VP1 gene expression (*i.e.* highest Ct value) was set as calibrator. Finally,  
255 differences in viral load were analyzed using an analysis of covariance  
256 (ANCOVA), in which the dependent variable (viral load) was explained by a lineal  
257 model including tank nested to genogroup as factor and time of death and body  
258 weight of fish as covariate.

259

## 260 RESULTS

261

### 262 *Mortality*

263

264 Mortality due to IPNV started at day 4 post-challenge in fish infected with  
265 either WB1 or WB2. In fish challenged with isolates from genogroup 5, mortality  
266 began on day 11 (SP2) and day 13 (SP1) post infection. Cumulative mortality at  
267 day 30 post infection was low in all groups challenged, but especially in fish  
268 infected with isolates from genogroup 5, with final cumulative mortalities of  
269 0.67% and 1% for SP1 and SP2, respectively. Fish infected with genogroup 1  
270 isolates showed a higher cumulative mortality, with 2.33% for WB2 and 7.33%  
271 for WB1. Overall, trout infected with isolates belonging to genogroup 5 showed a  
272 total cumulative mortality of 0.84%. The total cumulative mortality reached  
273 4.73% for genogroup 1. Kaplan–Meier (Log-Rank) analysis showed that the  
274 mortality curves of fish infected with the four isolates were significantly different

275 ( $p < 0.0001$ ), and that isolate WB1 had a significantly higher mortality rate over  
276 time than either of the two isolates from genogroup 5 (Figure 1). Furthermore,  
277 when comparing the two genogroups, the mortality rate of trout infected with  
278 genogroup 1 isolates was significantly higher than of those challenged with  
279 isolates from genogroup 5 ( $p < 0.0001$ ).

280

281

282 *IPNV testing and viral load*

283 *Mortality samples*

284

285 A total of 49 mortality samples were tested to confirm the presence of  
286 IPNV by RT-qPCR and IFAT. The virus was detected in 34 of the analyzed  
287 samples (69.4%). IPNV positive samples by IFAT showed cells with a distinctive  
288 fluorescent staining, indicating that these samples contained infective viral  
289 particles. Samples ranged from a few fluorescent cells to hundreds per coverslip  
290 in high viral titer samples (Figure 2). There was substantial agreement between  
291 the two diagnostics methods (Kappa = 0.62,  $p < 0.0001$ ), however, RT-qPCR was  
292 more sensitive, detecting IPNV in 33 of the samples tested, where only 26  
293 positive samples were detected by IFAT. From the 34 positive samples, 29 were  
294 infected with isolates from genogroup 1, and 5 with isolates from genogroup 5.  
295 On average, virus load measured by RT-qPCR was 2 folds higher in fish infected  
296 with isolates from genogroup 5 than from genogroup 1. When the viral loads  
297 were compared by means of a ANCOVA using tank nested to genogroup as factor  
298 a statically significant difference was found ( $p = 0.005$ ).

299

300

301 *Survivor fish samples*

302

303 Survivor fish sampled at day 1, 7 and 20 post infection, were analyzed to  
304 test for the presence of IPNV and to assess viral load by RT-qPCR. A total of 144  
305 samples were tested and IPNV was found in 48 (33.3%), 23 belonging to fish  
306 infected with genogroup 1 isolates and 24 from genogroup 5. At day one post  
307 infection, IPNV positive samples were only detected in fish infected with isolate  
308 WB2, but showed very little VP1 mRNA expression, with a Ct value near cutoff  
309 value. Thus, one of these samples was set as calibrator for relative quantification  
310 of IPNV. At day 7 and 20 post infection all fish groups challenged with the  
311 different isolates showed at least one sample with the presence of the virus. Fish  
312 infected with isolate SP2 had the highest prevalence of IPNV, with 17 positive  
313 samples, while SP1 infected fish had the lowest, with seven samples positive to  
314 the virus (data not shown). In fish infected with isolates WB1 and WB2 from  
315 genogroup 1 the virus was detected in 12 and 11 of the analyzed samples,  
316 respectively. There was an increase in viral load throughout the challenge in fish  
317 infected with both genogroups, reaching a peak at day 20 post infection (Figure  
318 3). As with mortality samples, viral load in survivor fish was, on average, higher  
319 in fish infected with isolates from genogroup 5 than with genogroup 1, and when  
320 the means of both groups were compared by an ANCOVA test, there was a  
321 statistically significant difference ( $p = 0.018$ ).

322

323

324

325 DISCUSSION

326

327 Previous reports have demonstrated that there is host genetic variation in  
328 resistance to IPNV and that virulence may vary between IPNV isolates, causing  
329 great variation in mortality rates during outbreaks of the disease (Storset et al.,  
330 2007; Skjesol et al., 2011; Mutoloki et al., 2016). In this study, the mortality and  
331 viral load of rainbow trout fry individuals infected with Chilean IPNV isolates  
332 from genogroup 1 and 5 (more commonly known as strains WB and Sp,  
333 respectively) were compared by means of a 30-day experimental challenge. Our  
334 findings suggest that IPNV isolates from genogroup 1 were more virulent, i.e.  
335 caused a higher mortality rate, than isolates from genogroup 5 in rainbow trout.  
336 This lends support to previous findings that suggested a host-specific  
337 relationship between IPNV isolates from genogroup 1 and salmonids from the  
338 genus *Oncorhynchus* farmed in Chile, based on the data from more than one  
339 hundred Chilean isolates from both genogroups (Tapia et al., 2015; Torres et al.,  
340 2016). Furthermore, since the publication of those studies these authors have  
341 continued to sequence more IPNV isolates, finding the same association between  
342 genogroups and salmonid species (Eissler et al. 2017). Conversely, Manriquez et  
343 al. (2017) recently suggested that there is no fixed relationship between  
344 salmonid species and genogroups of IPNV in Chile, since they found genogroup 1  
345 isolates not only in *O. mykiss* and *O. kisutch* but also in *S. salar*. However, these  
346 authors molecularly characterized only 36 Chilean isolates, from which 10 were  
347 classified in genogroup 1, and only 4 came from *S. salar*. Hence, it is important to  
348 bear in mind that although there is a well known relationship between the  
349 genogroups of IPNV and salmonids present in Chile, this is not strict host  
350 specificity, and both salmon and trout can be infected with either genogroup of  
351 the virus.

352           This type of host-specific relationship has also been reported for other  
353 salmonid viruses, such as Infectious Hematopoietic Necrosis Virus (IHNV) in  
354 North America, where most of the isolates of the genogroups named U and M,  
355 come predominantly from sockeye salmon (*O. nerka*) and rainbow trout,  
356 respectively (Garver et al., 2003). Studies based on experimental challenges with  
357 both species and genogroups have shown that the relationship was associated  
358 with a specific virulence of IHN for each host, which depends mainly on the  
359 ability of the virus to enter the host fish and replicate (Garver et al., 2006;  
360 Peñaranda et al., 2009, 2011; Purcell et al., 2009). As with IPNV, IHNV isolates  
361 from both the U and M genogroups can infect rainbow trout; however, only the M  
362 genogroup viruses are highly virulent in this species. Using RT-qPCR they  
363 showed that viral load was significantly higher in trout infected with the more  
364 virulent M virus. Furthermore, a microarray analysis indicated that infection  
365 resulted in a greater overall host transcriptome change, suggesting that the M  
366 virus was more efficient at mediating host cell shutoff in order to enhance viral  
367 replication (Purcell et al., 2011).

368           Despite low mortality rates, viral load with IPNV genogroup 5 isolates  
369 was high and, these fish were indeed infected with IPNV and viral replication  
370 occurred until the last day of sampling, 20 days post infection. More  
371 interestingly, there is a tendency for genogroup 5 to have higher virus load on  
372 average than fish infected with isolates from genogroup 1, in both mortality and  
373 survivor fish samples. This would suggest that WB strain type isolates require  
374 the same or even less viral load than Sp strain to cause greater mortality in  
375 rainbow trout. This is in contrast to what was seen in IHNV, and previous studies  
376 that show a positive relation between mortality caused by IPNV and virus load in

377 Atlantic salmon, i.e. higher mortalities were associated with higher viral loads in  
378 susceptible fish or in fish infected with more virulent isolates (Skjesol et al.,  
379 2011; Reyes-Lopez et al., 2015; Robledo et al., 2016). It is important to point out  
380 that both isolates from genogroup 5 had contained high virulence marker, Thr<sub>217</sub>  
381 and Ala<sub>221</sub>, in their VP2 sequence; whereas isolates from genogroup 1 had the  
382 avirulent motif, Pro<sub>217</sub> and Thr<sub>221</sub>. Nonetheless, virulence was higher for  
383 genogroup 1 isolates in trout, suggesting that these virulence motifs are specific  
384 for the Sp strain, and that other genetic variants could have an effect on the  
385 virulence of the WB strain. Furthermore, in a previous challenge in Atlantic  
386 salmon, isolates SP1 and SP2 were able to cause significant mortality (data not  
387 shown), indicating that these viruses were virulent only in this species.

388 As was expected, mortality varied between fish infected with different  
389 isolates. However, overall mortality levels for the challenge were low, and only  
390 moderate differences in mortality were noted. It is well known that induction of  
391 overt IPN disease and mortality in experimental challenges is difficult to achieve,  
392 and is determined by several input variables like virus dose, fish age,  
393 temperature, infection route and host genetic susceptibility. For the challenge  
394 performed in this study we tried to meet the criteria for most of the variables  
395 recommended to obtain IPN-induced mortality in rainbow trout, by infecting  
396 first feeding fry via waterborne with a relatively high virus dose and maintaining  
397 them at 10 °C. However, it is plausible that a number of limitations could have  
398 influenced the results obtained and overall low mortalities reached in the  
399 challenge. One of the possible limitations was the virus dose.

400 Some authors recommend a dose as high as  $1 \times 10^7$  TCID<sub>50</sub>/mL per fish to  
401 attain higher mortalities in a cohabitation challenge with IPNV (Munang'andu et



402 al., 2016). However, we were unable to obtain higher viral titers without  
403 increasing the number of passages of the isolates in cell culture. Nevertheless,  
404 several researchers have used the same dose used in this study in immersion  
405 challenges and have obtained considerably higher mortalities in rainbow trout  
406 and Atlantic salmon (Okamoto et al., 1987; Skjesol et al., 2011; Robledo et al.,  
407 2016).

408 Another technical limitation of this study is that neither phenotypic nor  
409 genotypic data for IPNV resistance of the rainbow trout individuals challenged  
410 was available. Recently it has been reported that mortality due to IPN in rainbow  
411 trout can range between 0% and 100% for the most resistant and susceptible  
412 families, respectively (Yoshida et al., 2019). Munang'andu et al. (2016) pointed  
413 out the importance of using highly susceptible fish to establish a challenge model  
414 for IPNV in Atlantic salmon that achieves mortalities above 75% in infected fish.  
415 Thus, it would be recommended that in future trials rainbow trout from known  
416 susceptible families are used in order to reach higher mortality levels that allow  
417 greater differentiation between groups.

418 Together these results show that IPNV isolates from genogroup 1 and  
419 genogroup 5 could infect rainbow trout but only the former caused important  
420 mortality in this species. This would suggest that IPNV isolates from the WB type  
421 strain are more virulent in rainbow trout than those from the Sp strain, and  
422 there is an association between the phylogenetic classification of IPNV and host  
423 susceptibility.

424

425

426

427

428

429

430

431 ACKNOWLEDGEMENTS

432

433           The authors would like to thank Dr. Yoanna Eissler, Dr. Juan Kuznar and  
434 M.Cs. Juan Carlos Espinoza for their support in the completion of this study; the  
435 Laboratory of Virology of the University of Valparaíso for providing the viruses  
436 used and the infrastructure for the analysis of the samples; Germán Olivares and  
437 all the staff from the Rio Blanco hatchery for providing the experimental fish; and  
438 Veterquímica S.A. for enabling the facilities used in the challenge. We gratefully  
439 acknowledge the financial support provided by Subsecretaría de Pesca y  
440 Acuicultura (SUBPESCA) Proyecto FIP N° 2014-60 and Comisión Nacional de  
441 Investigación Científica y Tecnológica (CONICYT) scholarship 21161531.

442

443

444

445

446

447

448

449

450

451

452

453

454

455

456 REFERENCES

457

458 Blake, S., Ma, J. Y., Caporale, D. A., Jairath, S., & Nicholson, B. L. (2001).  
459 Phylogenetic relationships of aquatic birnaviruses based on deduced amino  
460 acid sequences of genome segment A cDNA. *Dis Aquat Organ*, 45(2), 89-102.  
461 doi:10.3354/dao045089

462 Bootland, L. M., Dobos, P., & Stevenson, R. M. (1991). The IPNV carrier state and  
463 demonstration of vertical transmission in experimentally infected brook  
464 trout. *Diseases of aquatic organisms*, 10, 13-21. doi:10.3354/dao010013

465 Calleja, F., Godoy, M.G., Cárcamo, J.G., Bandín, I., Yáñez, A.J., Dopazo, C.P., Kibenge,  
466 F.S. & Avendaño-Herrera, R. (2012). Use of reverse transcription-real time  
467 polymerase chain reaction (real time RT-PCR) assays with Universal Probe  
468 Library (UPL) probes for the detection and genotyping of infectious  
469 pancreatic necrosis virus strains isolated in Chile. *Journal of Virological  
470 Methods*, 183(1), 80-85. doi:10.1016/j.jviromet.2012.03.022

471 Dobos, P. (1995). The molecular biology of infectious pancreatic necrosis virus  
472 (IPNV). *Annual Review of Fish Diseases*, 5(0), 25-54. doi:10.1016/0959-  
473 8030(95)00003-8

474 Eissler, Y., Pavlov, M. S., Conejeros, P., Espinoza, J. C., & Kuznar, J. (2011).  
475 Detection and quantification of Chilean strains of infectious pancreatic  
476 necrosis virus by real-time RT-PCR assays using segment B as a target. *Lat.  
477 Am. J. Aquat. Res.*, 39(3), 9. doi:10.3856/vol39-issue3-fulltext-14

478 Eissler, Y., Rosenfeld, C., Espinoza, J. C., Kuznar, J., Tapia, D., & Torres, P. (2017).  
479 Determinación de factores epidemiológicos de riesgo en la presentación  
480 clínica de la enfermedad Necrosis Pancreática Infecciosa. Informe Final  
481 Proyecto Fondo de Investigación Pesquera y de Acuicultura FIPA 2014-  
482 60. Retrieved from [http://www.subpesca.cl/fipa/613/articles-  
483 89418\\_informe\\_final.pdf](http://www.subpesca.cl/fipa/613/articles-89418_informe_final.pdf)

484 Espinoza, E., Farías, G., Soler, M., & Kuznar, J. (1985). Identity between Infectious  
485 Pancreatic Necrosis Virus VR-299 and a Chilean Isolate. *Intervirology*, 24(1),  
486 58-60. doi:10.1159/000149619

487 Espinoza, J. C., & Kuznar, J. (2002). Rapid simultaneous detection and  
488 quantitation of infectious pancreatic necrosis virus (IPNV). *Journal of  
489 Virological Methods*, 105(1), 81-85. doi:Pii S0166-0934(02)00083-6

490 Evensen, Ø., & Santi, N. (2008). Infectious Pancreatic Necrosis Virus. In B. W. J. M.  
491 H. V. V. Regenmortel (Ed.), *Encyclopedia of Virology (Third Edition)* (pp. 83-  
492 89). Oxford: Academic Press. doi:[https://doi.org/10.1016/B978-  
493 012374410-4.00772-X](https://doi.org/10.1016/B978-012374410-4.00772-X)

- 494 FAO. (2019, 26 April). Fisheries Global Information System (FIGIS) Integrated  
495 web-based dissemination system. Retrieved from  
496 <http://www.fao.org/fishery/>
- 497 Flores-Mara, R., Rodríguez, F. H., Banger, R., Lhorente, J. P., Neira, R., Newman,  
498 S., & Yáñez, J. M. (2017). Resistance against infectious pancreatic necrosis  
499 exhibits significant genetic variation and is not genetically correlated with  
500 harvest weight in rainbow trout (*Oncorhynchus mykiss*). *Aquaculture*, 479,  
501 155-160. doi:<https://doi.org/10.1016/j.aquaculture.2017.05.042>
- 502 Garver, K. A., Batts, W. N., & Kurath, G. (2006). Virulence Comparisons of  
503 Infectious Hematopoietic Necrosis Virus U and M Genogroups in Sockeye  
504 Salmon and Rainbow Trout. *J Aquat Anim Health*, 18(4), 232-243.  
505 doi:10.1577/H05-038.1
- 506 Garver, K. A., Troyer, R. M., & Kurath, G. (2003). Two distinct phylogenetic clades  
507 of infectious hematopoietic necrosis virus overlap within the Columbia  
508 River basin. *Diseases of aquatic organisms*, 55(3), 187-  
509 203. doi:10.3354/dao055187
- 510 Hill, B. J., & Way, K. (1995). Serological classification of infectious pancreatic  
511 necrosis (IPN) virus and other aquatic birnaviruses. *Annual Review of Fish*  
512 *Diseases*, 5(0), 55-77. doi:[http://dx.doi.org/10.1016/0959-8030\(95\)00011-](http://dx.doi.org/10.1016/0959-8030(95)00011-9)  
513 9
- 514 Houston, R.D., Haley, C.S., Hamilton, A., Guy, D.R., Tinch, A.E., Taggart, J.B.,  
515 McAndrew, B.J., & Bishop, S.C. (2008). Major quantitative trait loci affect  
516 resistance to infectious pancreatic necrosis in Atlantic salmon (*Salmo*  
517 *salar*). *Genetics*, 178(2), 1109-1115. doi:10.1534/genetics.107.082974
- 518 Jarp, J., Gjevre, A. G., Olsen, A. B., & Bruheim, T. (1995). Risk-Factors for  
519 Furunculosis, Infectious Pancreatic Necrosis and Mortality in Post-Smolt of  
520 Atlantic Salmon, *Salmo-Salar* L. *Journal of Fish Diseases*, 18(1), 67-78.  
521 doi:10.1111/j.1365-2761.1995.tb01267.x
- 522 Jorquera, E., Morales, P., Tapia, D., Torres, P., Eissler, Y., Espinoza, J.C., Conejeros,  
523 P., & Kuznar, J. (2016). Chilean IPNV isolates: Robustness analysis of PCR  
524 detection. *Electronic Journal of Biotechnology*, 20, 28-32. doi:  
525 <https://doi.org/10.1016/j.ejbt.2016.01.001>
- 526 Macdonald, R. D., & Gower, D. A. (1981). Genomic and phenotypic divergence  
527 among three serotypes of aquatic birnaviruses (infectious pancreatic  
528 necrosis virus). *Virology*, 114(1), 187-195.  
529 doi:[http://dx.doi.org/10.1016/0042-6822\(81\)90264-6](http://dx.doi.org/10.1016/0042-6822(81)90264-6)
- 530 Manríquez, R. A., Vera, T., Villalba, M. V., Mancilla, A., Vakharia, V. N., Yáñez, A. J.,  
531 & Cárcamo, J. G. (2017). Molecular characterization of infectious pancreatic  
532 necrosis virus strains isolated from the three types of salmonids farmed in  
533 Chile. *Virology Journal*, 14(1), 17. doi:10.1186/s12985-017-0684-x
- 534 McAllister, P. E., & Reyes, X. (1984). Infectious pancreatic necrosis virus: isolation  
535 from rainbow trout, *Salmo gairdneri* Richardson, imported into Chile.  
536 *Journal of Fish Diseases*, 7, 4. doi:[https://doi.org/10.1111/j.1365-](https://doi.org/10.1111/j.1365-2761.1984.tb00938.x)  
537 2761.1984.tb00938.x

- 538 McCowan, C., Motha, J., Crane, M. S., Moody, N. J., Crameri, S., Hyatt, A. D., &  
539 Bradley, T. (2015). Isolation of a novel aquatic birnavirus from rainbow  
540 trout *Oncorhynchus mykiss* in Australia. *Dis Aquat Organ*, *114*(2), 117-125.  
541 doi:10.3354/dao02858
- 542 Moen, T., Baranski, M., Sonesson, A. K., & Kjolglum, S. (2009). Confirmation and  
543 fine-mapping of a major QTL for resistance to infectious pancreatic necrosis  
544 in Atlantic salmon (*Salmo salar*): population-level associations between  
545 markers and trait. *BMC Genomics*, *10*, 368. doi:10.1186/1471-2164-10-368
- 546 Moen, T., Torgersen, J., Santi, N., Davidson, W.S., Baranski, M., Odegard, J.,  
547 Kjolglum, S., Velle, B., Kent, M., Lubieniecki, K.P., Isdal, E., & Lien, S. (2015).  
548 Epithelial Cadherin Determines Resistance to Infectious Pancreatic  
549 Necrosis Virus in Atlantic Salmon. *Genetics*, *200*(4), 1313-1326.  
550 doi:10.1534/genetics.115.175406
- 551 Mohr, P. G., Moody, N. J., Williams, L. M., Hoad, J., & Crane, M. S. J. (2015).  
552 Molecular characterization of Tasmanian aquabirnaviruses from 1998 to  
553 2013. *Diseases of aquatic organisms*, *116*(1), 1-9. doi: 10.3354/dao02903
- 554 Munang'andu, H. M., Santi, N., Fredriksen, B. N., Lokling, K. E., & Evensen, O.  
555 (2016). A Systematic Approach towards Optimizing a Cohabitation  
556 Challenge Model for Infectious Pancreatic Necrosis Virus in Atlantic Salmon  
557 (*Salmo salar* L.). *PloS one*, *11*(2), e0148467.  
558 doi:10.1371/journal.pone.0148467
- 559 Mutoloki, S., & Evensen, O. (2011). Sequence similarities of the capsid gene of  
560 Chilean and European isolates of infectious pancreatic necrosis virus point  
561 towards a common origin. *Journal of general virology*, *92*(7), 1721-1726.  
562 doi:10.1099/vir.0.030270-0
- 563 Mutoloki, S., Jossund, T. B., Ritchie, G., Munang'andu, H. M., & Evensen, O. (2016).  
564 Infectious Pancreatic Necrosis Virus Causing Clinical and Subclinical  
565 Infections in Atlantic Salmon Have Different Genetic Fingerprints. *Front*  
566 *Microbiol*, *7*, 1393. doi:10.3389/fmicb.2016.01393
- 567 Nishizawa, T., Kinoshita, S., & Yoshimizu, M. (2005). An approach for  
568 genogrouping of Japanese isolates of aquabirnaviruses in a new genogroup,  
569 VII, based on the VP2/NS junction region. *Journal of general virology*, *86*(7),  
570 1973-1978. doi:10.1099/vir.0.80438-0
- 571 OIE. (2006). *Manual of Diagnostic Tests for Aquatic Animals*, 5th edition. ed.  
572 Health World Organization for Animal, Paris.
- 573 Okamoto, N., Seno, Y., Taniguchi, N., & Sano, T. (1987). Relationship between  
574 inoculative quantity of infectious pancreatic necrosis virus and the  
575 mortality of rainbow trout [*Salmo gairdnerii*] fry. *Bulletin of the Japanese*  
576 *Society of Scientific Fisheries (Japan)*. doi:  
577 <https://doi.org/10.2331/suisan.53.1975>
- 578 Penaranda, M. M., Purcell, M. K., & Kurath, G. (2009). Differential virulence  
579 mechanisms of infectious hematopoietic necrosis virus in rainbow trout  
580 (*Oncorhynchus mykiss*) include host entry and virus replication kinetics. *J*  
581 *Gen Virol*, *90*(Pt 9), 2172-2182. doi:10.1099/vir.0.012286-0

- 582 Penaranda, M. M., Wargo, A. R., & Kurath, G. (2011). In vivo fitness correlates  
583 with host-specific virulence of Infectious hematopoietic necrosis virus  
584 (IHNV) in sockeye salmon and rainbow trout. *Virology*, 417(2), 312-319.  
585 doi:10.1016/j.virol.2011.06.014
- 586 Pfaffl, M. W. (2001). A new mathematical model for relative quantification in  
587 real-time RT-PCR. *Nucleic acids research*, 29(9), e45-e45.  
588 doi:10.1093/nar/29.9.e45
- 589 Purcell, M. K., Garver, K. A., Conway, C., Elliott, D. G., & Kurath, G. (2009).  
590 Infectious haematopoietic necrosis virus genogroup-specific virulence  
591 mechanisms in sockeye salmon, *Oncorhynchus nerka* (Walbaum), from  
592 Redfish Lake, Idaho. *J Fish Dis*, 32(7), 619-631. doi:10.1111/j.1365-  
593 2761.2009.01045.x
- 594 Purcell, M. K., Marjara, I. S., Batts, W., Kurath, G., & Hansen, J. D. (2011).  
595 Transcriptome analysis of rainbow trout infected with high and low  
596 virulence strains of infectious hematopoietic necrosis virus. *Fish Shellfish*  
597 *Immunol*, 30(1), 84-93. doi:10.1016/j.fsi.2010.09.007
- 598 Reed, L. J., & Muench, H. (1938). A simple method of estimating fifty per cent  
599 endpoints. *American journal of epidemiology*, 27(3), 493-497. doi:  
600 <https://doi.org/10.1093/oxfordjournals.aje.a118408>
- 601 Reyes-Lopez, F.E., Romeo, J.S., Vallejos-Vidal, E., Reyes-Cerpa, S., Sandino, A.M.,  
602 Tort, L., Mackenzie, S., & Imarai, M. (2015). Differential immune gene  
603 expression profiles in susceptible and resistant full-sibling families of  
604 Atlantic salmon (*Salmo salar*) challenged with infectious pancreatic  
605 necrosis virus (IPNV). *Dev Comp Immunol*, 53(1), 210-221.  
606 doi:10.1016/j.dci.2015.06.017
- 607 Robledo, D., Taggart, J.B., Ireland, J.H., McAndrew, B.J., Starkey, W.G., Haley, C.S.,  
608 Hamilton, A., Guy, D.R., Mota-Velasco, J.C., Gheyas, A.A., Tinch, A.E., Verner-  
609 Jeffreys, D.W., Paley, R.K., Rimmer, G.S., Tew, I.J., Bishop, S.C., Bron, J.E., &  
610 Houston, R.D. (2016). Gene expression comparison of resistant and  
611 susceptible Atlantic salmon fry challenged with Infectious Pancreatic  
612 Necrosis virus reveals a marked contrast in immune response. *BMC*  
613 *Genomics*, 17, 279. doi:10.1186/s12864-016-2600-y
- 614 Rodrigues, F., Flores-Mara, R., Yoshida, G., Barria, A., Jedlicki, A., Lhorente, J.P.,  
615 Reyes, F., & Yanez, J.M. (2019). Genome-wide association analysis for  
616 resistance to infectious pancreatic necrosis virus identifies candidate genes  
617 involved in viral replication and immune response in rainbow trout  
618 (*Oncorhynchus mykiss*). *bioRxiv*,  
619 569632. doi:<https://doi.org/10.1101/569632>
- 620 Ruane, N. M., McCleary, S. J., McCarthy, L. J., & Henshilwood, K. (2015).  
621 Phylogenetic analysis of infectious pancreatic necrosis virus in Ireland  
622 reveals the spread of a virulent genogroup 5 subtype previously associated  
623 with imports. *Archives of virology*, 160(3), 817-824. doi: 10.1007/s00705-  
624 014-2307-9

- 625 Santi, N., Vakharia, V. N., & Evensen, Ø. (2004). Identification of putative motifs  
626 involved in the virulence of infectious pancreatic necrosis virus. *Virology*,  
627 322(1), 31-40. doi:10.1016/j.virol.2003.12.016
- 628 Skjesol, A., Skjæveland, I., Elnæs, M., Timmerhaus, G., Fredriksen, B.N., Jørgensen,  
629 S., Krasnov, A., & Jørgensen, J.B. (2011). IPNV with high and low virulence:  
630 host immune responses and viral mutations during infection. *Virology*  
631 *Journal*, 8(1), 396. doi:10.1186/1743-422x-8-396
- 632 Song, H., Santi, N., Evensen, O., & Vakharia, V. N. (2005). Molecular Determinants  
633 of Infectious Pancreatic Necrosis Virus Virulence and Cell Culture  
634 Adaptation. *Journal of Virology*, 79(16), 10289-10299.  
635 doi:10.1128/jvi.79.16.10289-10299.2005
- 636 Storset, A., Strand, C., Wetten, M., Kjølglum, S., & Ramstad, A. (2007). Response to  
637 selection for resistance against infectious pancreatic necrosis in Atlantic  
638 salmon (*Salmo salar* L.). *Aquaculture*, 272, S62-S68.  
639 doi:10.1016/j.aquaculture.2007.08.011
- 640 Tapia, D., Eissler, Y., Torres, P., Jorquera, E., Espinoza, J., & Kuznar, J. (2015).  
641 Detection and phylogenetic analysis of infectious pancreatic necrosis virus  
642 in Chile. *Diseases of aquatic organisms*, 116(3), 173-184. doi:  
643 10.3354/dao02912.
- 644 Torres, P., Eissler, Y., Tapia, D., Espinoza, J. C., & Kuznar, J. (2016).  
645 Genotipificación y relación hospedador-específica del virus de la necrosis  
646 pancreática infecciosa en Chile. *Latin american journal of aquatic research*,  
647 44, 860-868. doi:http://dx.doi.org/10.3856/vol44-issue4-fulltext-23
- 648 Viera AJ, Garrett JM (2005) Understanding interobserver agreement: the kappa  
649 statistic. *Fam Med* 37:360–363.
- 650 Yoshida, G. M., Carvalheiro, R., Rodriguez, F. H., Lhorente, J. P., & Yanez, J. M.  
651 (2019). Single-step genomic evaluation improves accuracy of breeding  
652 value predictions for resistance to infectious pancreatic necrosis virus in  
653 rainbow trout. *Genomics*, 111(2), 127-132.  
654 doi:10.1016/j.ygeno.2018.01.008
- 655  
656  
657  
658  
659  
660  
661  
662  
663  
664  
665

666

667

668

669

670

671

672

673

674 TABLES

675

676 Table 1. Primers and probes used for the RT-qPCR assays to identify and quantify  
677 IPNV in samples from challenged individuals.

| Assay name | Primer/Probe name | Primer sequence (5'-3')                               | Target                                  |
|------------|-------------------|-------------------------------------------------------|-----------------------------------------|
| IPNV VP1   | IPNV VP1          | 5'FAM-TACATAGGC-ZEN-<br>AAAACCAAAGGAGACAC-<br>3IABkFQ | IPNV<br>Segment B:<br>668-820           |
|            | VP1F              | GTTGATMMASTACACCGGAG                                  |                                         |
|            | VP1R              | AGGTCHCKTATGAAGGAGTC                                  |                                         |
| ELF4       | ELF4 F            | GTATGATCGTCACCTTCGCCC                                 | Salmonid<br>ELF 1 $\alpha$ :<br>884-963 |
|            | ELF4 R            | CGATTCCAGGGTCTCGTGGT                                  |                                         |

678

679

680

681

682

683

684

685

686

687

688



689

690

691

692

693

694

695

696 FIGURES

697

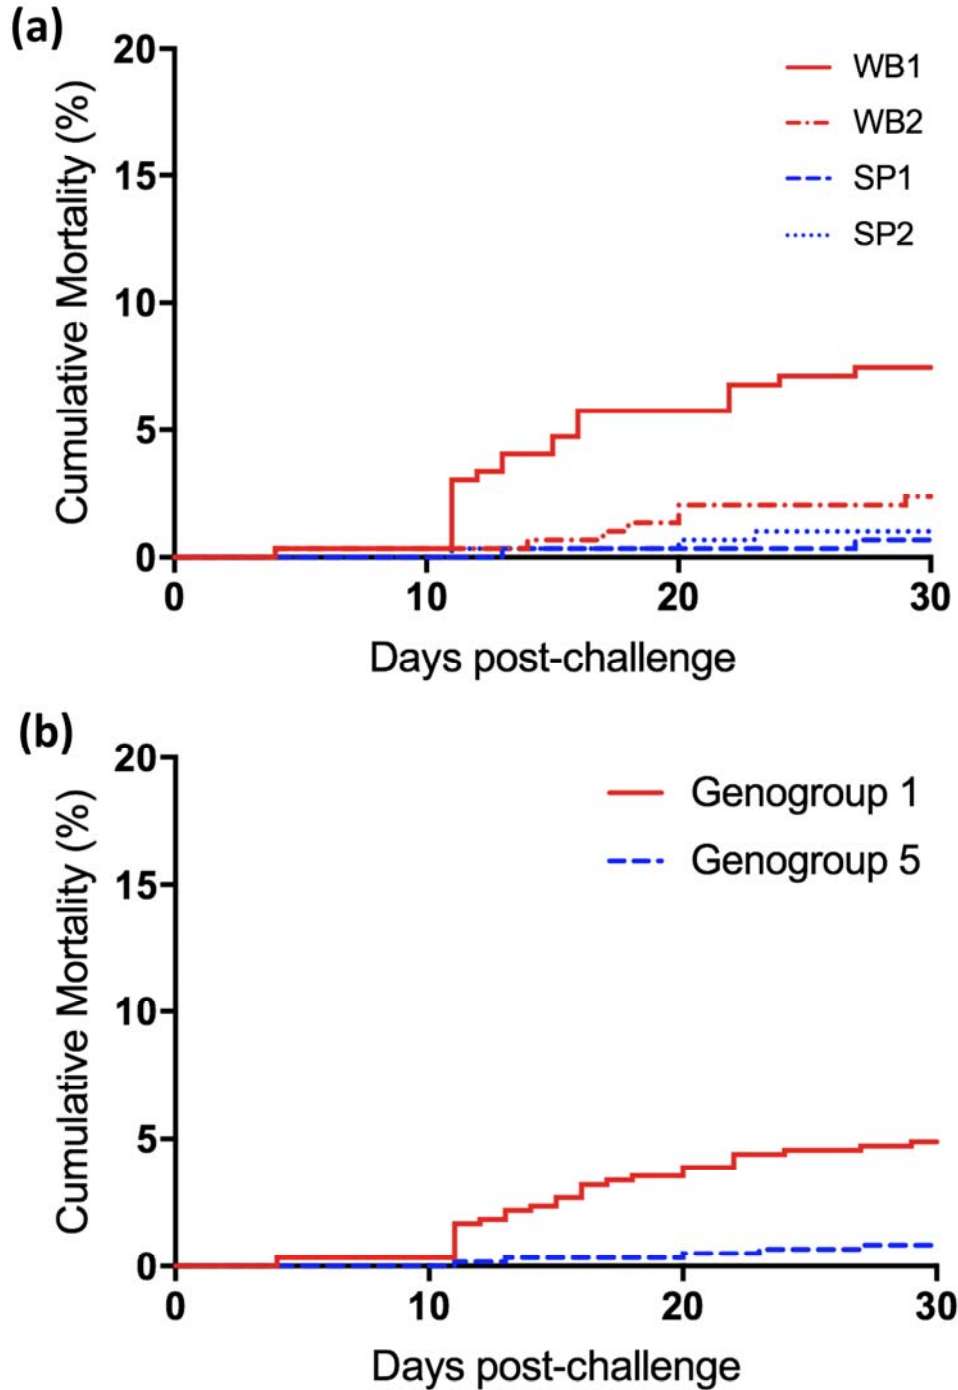

698  
699  
700  
701  
702  
703  
704  
705

Figure 1. Kaplan-Meier mortality curves for rainbow trout infected with four isolates of IPNV from Genogroup 1 and 5. The cumulative mortality caused by each isolate is presented in a), and the combined mortality caused by isolates of each Genogroup is presented in b).

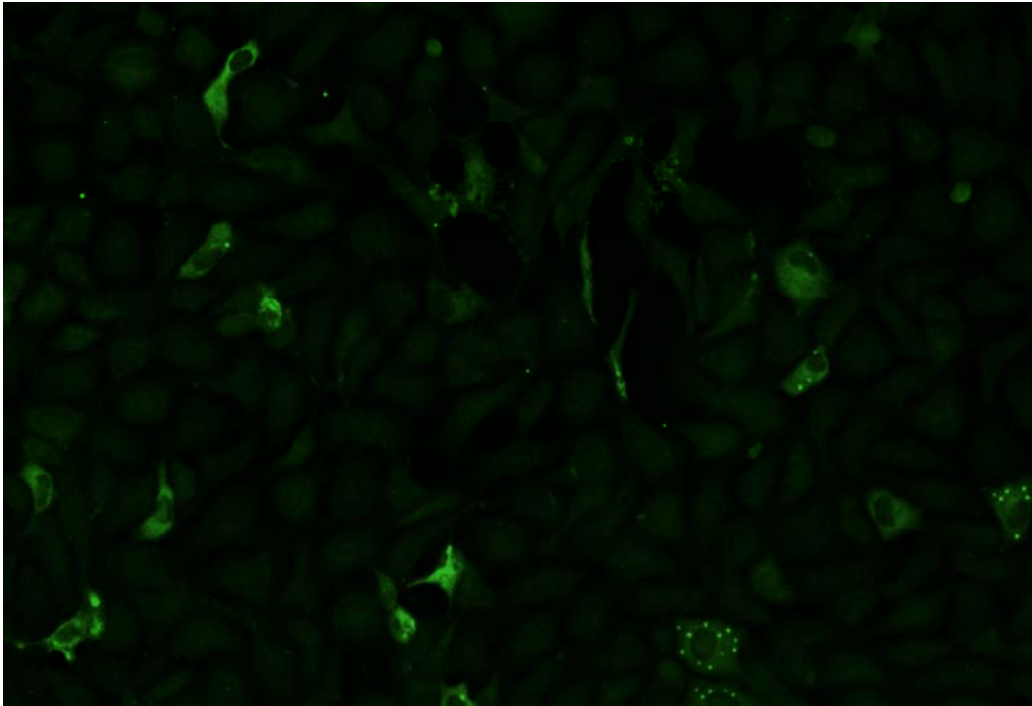

706  
707 Figure 2. Indirect Fluorescent Antibody Test (IFAT) of IPNV positive mortality  
708 samples (10x). CHSE-214 cells infected with sample from fish challenged with  
709 Genogroup 5 isolate SP2 and stained with a polyclonal antibody against VP2  
710 protein. Several infected (fluorescent) cells can be seen in the monolayer  
711 indicating a high viral titer.  
712  
713

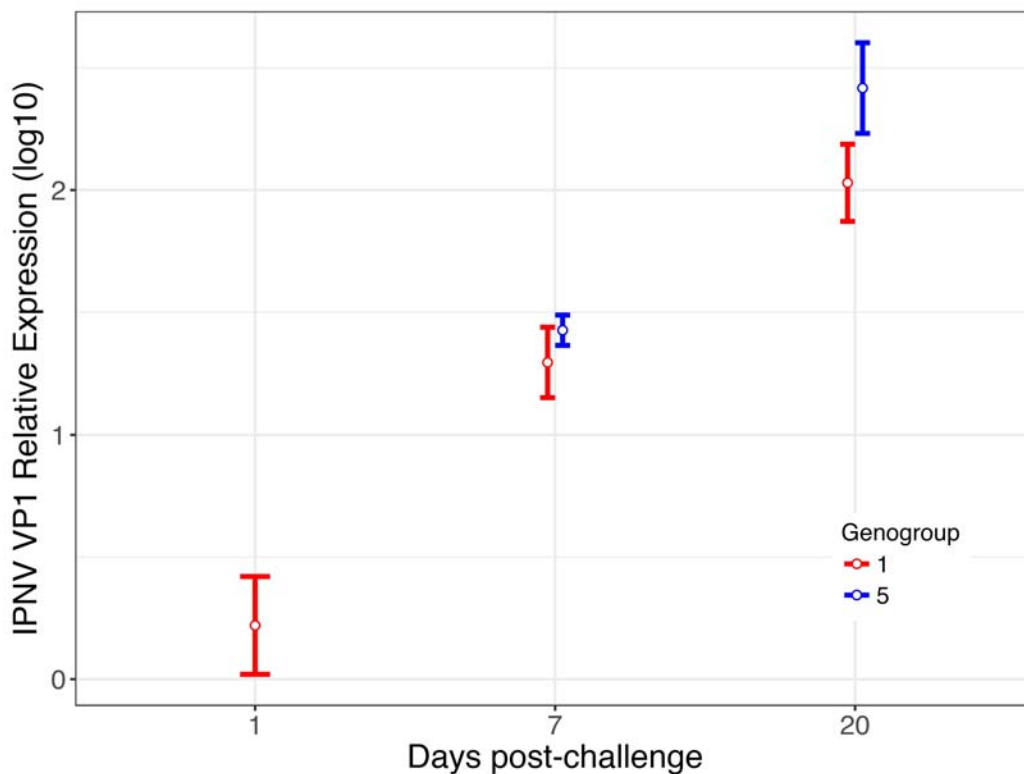

714

715 Figure 3. IPNV virus load in survivor fish sampled at days 1, 7 and 20 post-  
716 infection. Mean and standard error log<sub>10</sub> VP1 transcript relative levels measured  
717 by RT-qPCR using ELF1 $\alpha$  as housekeeping gene. No IPNV was detected in  
718 samples from genogroup 5 at day 1 post-infection.  
719
